# Supplementary material for: The Occurrence of the Colistin Resistance Gene mcr-1 in the Haihe River (China)
Source: PubMed Central journal article supplement (PMC5486262; doi:10.3390/ijerph14060576), 2017-05-29
Supplement: ijerph-14-00576-s001.pdf [file ijerph-14-00576-s001.pdf]

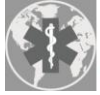

# Supplementary Materials: The Occurrence of the Colistin Resistance Gene *mcr-1* in the Haihe River (China)

Dong Yang <sup>1,†</sup>, Zhigang Qiu <sup>1,†</sup>, Zhiqiang Shen <sup>1,†</sup>, Hong Zhao <sup>2</sup>, Min Jin <sup>1</sup>, Huaying Li <sup>3</sup>, Weili Liu <sup>1</sup> and Jun-Wen Li <sup>1,\*</sup>

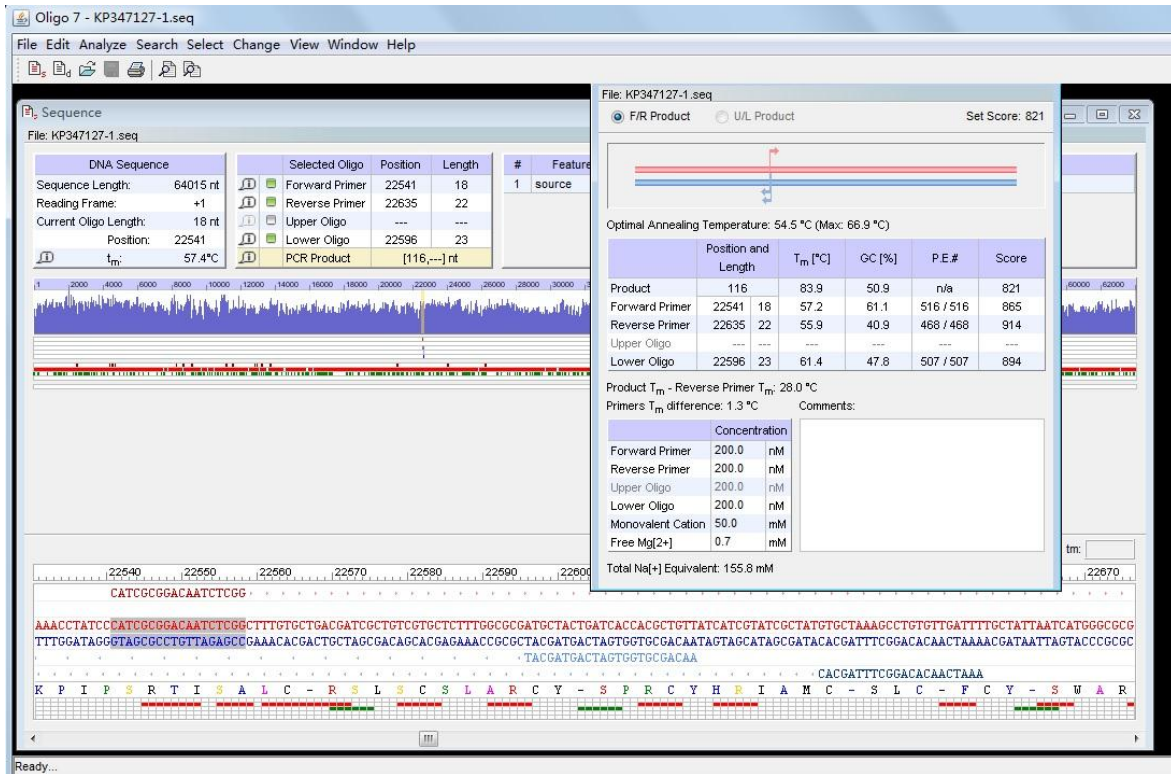

Figure S1. The scores of product, prime and probe in Oligo 7.0.

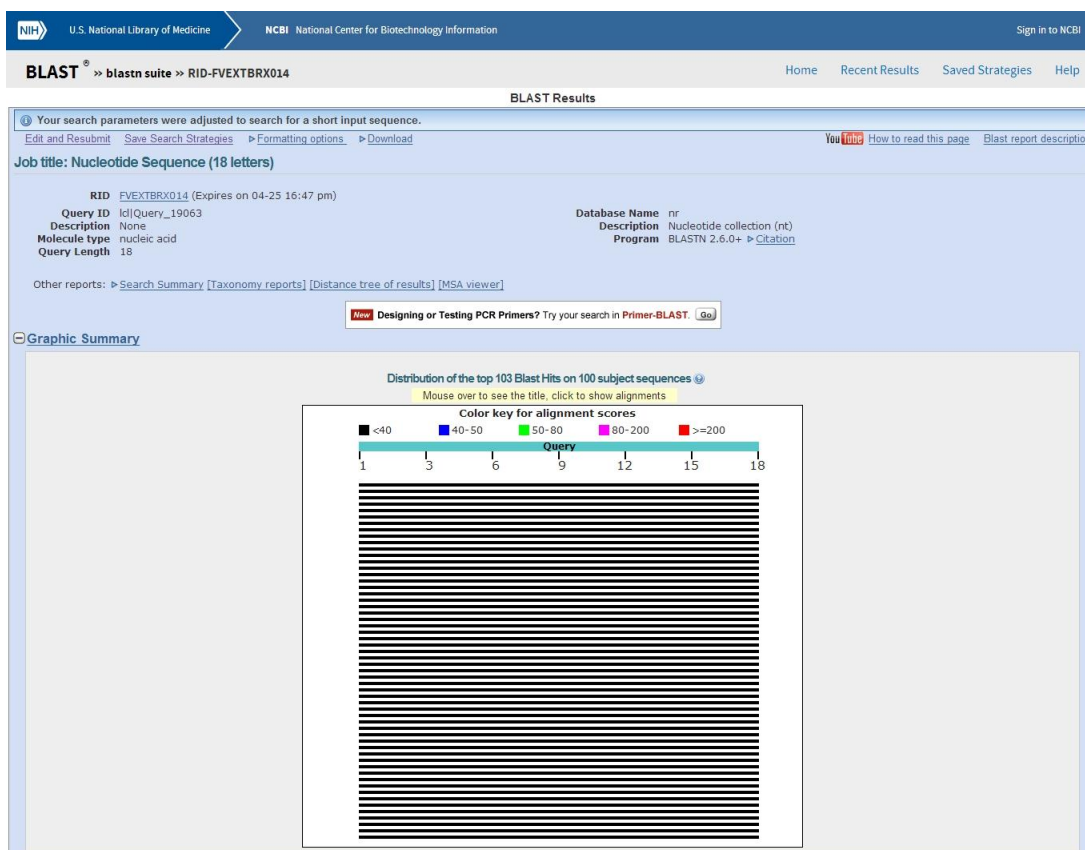

Figure S2. Cont.

Descriptions

Sequences producing significant alignments:

Select: All items Selected 0

1 Alignments Download GenBank Graphics Distance time of results

| Description                                                                                                                                                                          | Max score | Total | Query cover | E value | Ident | Accession   |
|--------------------------------------------------------------------------------------------------------------------------------------------------------------------------------------|-----------|-------|-------------|---------|-------|-------------|
| <a href="#">Escherichia coli strain FS170G plasmid pFS170G, complete sequence</a>                                                                                                    | 36.2      | 36.2  | 100%        | 3.7     | 100%  | KX711707.1  |
| <a href="#">Escherichia coli strain CS24 plasmid pCS24, complete sequence</a>                                                                                                        | 36.2      | 36.2  | 100%        | 3.7     | 100%  | KX711706.1  |
| <a href="#">Escherichia coli strain GD95 plasmid pGD95-4, complete sequence</a>                                                                                                      | 36.2      | 36.2  | 100%        | 3.7     | 100%  | KY075660.1  |
| <a href="#">Escherichia coli strain GD89 plasmid pGD89-2, complete sequence</a>                                                                                                      | 36.2      | 36.2  | 100%        | 3.7     | 100%  | KY075659.1  |
| <a href="#">Escherichia coli strain WH03 plasmid pWH03-3, complete sequence</a>                                                                                                      | 36.2      | 36.2  | 100%        | 3.7     | 100%  | KY075658.1  |
| <a href="#">Escherichia coli strain Lishui12 plasmid pLishui12-2, complete sequence</a>                                                                                              | 36.2      | 36.2  | 100%        | 3.7     | 100%  | KY075657.1  |
| <a href="#">Escherichia coli strain GD49 plasmid pGD49-3, complete sequence</a>                                                                                                      | 36.2      | 36.2  | 100%        | 3.7     | 100%  | KY075656.1  |
| <a href="#">Escherichia coli strain FS13228 plasmid pFS13228, complete sequence</a>                                                                                                  | 36.2      | 36.2  | 100%        | 3.7     | 100%  | KY421937.1  |
| <a href="#">Escherichia coli FS13228 contig 2 genomic sequence</a>                                                                                                                   | 36.2      | 36.2  | 100%        | 3.7     | 100%  | KY421935.1  |
| <a href="#">Escherichia coli FS13228 contig 1 genomic sequence</a>                                                                                                                   | 36.2      | 36.2  | 100%        | 3.7     | 100%  | KY421934.1  |
| <a href="#">Klebsiella pneumoniae strain KP2442 plasmid pKP2442_1c330, complete sequence</a>                                                                                         | 36.2      | 36.2  | 100%        | 3.7     | 100%  | KX434879.1  |
| <a href="#">Salmonella enterica subsp. enterica serovar Typhimurium strain Y1_14P053 plasmid pMCR16_P053, complete sequence</a>                                                      | 36.2      | 36.2  | 100%        | 3.7     | 100%  | KY352406.1  |
| <a href="#">Salmonella enterica subsp. enterica strain R150626 plasmid pR150626, complete sequence</a>                                                                               | 36.2      | 36.2  | 100%        | 3.7     | 100%  | KY120366.1  |
| <a href="#">Salmonella enterica subsp. enterica strain P1111 plasmid pP1111, complete sequence</a>                                                                                   | 36.2      | 36.2  | 100%        | 3.7     | 100%  | KY120365.1  |
| <a href="#">Escherichia coli strain EC72H1 phosphoethanolamine-lipid A transferase MCR-1 (mcr-1) gene, partial cds</a>                                                               | 36.2      | 36.2  | 100%        | 3.7     | 100%  | KX218852.1  |
| <a href="#">Escherichia coli strain WCHEC1613 plasmid pMCR_WCHEC1613, complete sequence</a>                                                                                          | 36.2      | 36.2  | 100%        | 3.7     | 100%  | CP019214.1  |
| <a href="#">Escherichia coli strain 2016C-3936C1 plasmid pMCR-1-CT, complete sequence</a>                                                                                            | 36.2      | 36.2  | 100%        | 3.7     | 100%  | CP018773.1  |
| <a href="#">Escherichia coli SLK172 plasmid pSLK172-1, complete sequence</a>                                                                                                         | 36.2      | 36.2  | 100%        | 3.7     | 100%  | CP017632.1  |
| <a href="#">Escherichia coli strain HVEC7 plasmid pHVEC7-mcr1, complete sequence</a>                                                                                                 | 36.2      | 36.2  | 100%        | 3.7     | 100%  | KX518745.1  |
| <a href="#">Escherichia coli strain IMP163 plasmid pMCR-1-P3, complete sequence</a>                                                                                                  | 36.2      | 36.2  | 100%        | 3.7     | 100%  | KX880944.1  |
| <a href="#">Escherichia coli strain EHS30-1 plasmid pEHS30-1, complete sequence</a>                                                                                                  | 36.2      | 36.2  | 100%        | 3.7     | 100%  | KX772391.1  |
| <a href="#">Escherichia coli strain E15004 plasmid pE15004, complete sequence</a>                                                                                                    | 36.2      | 36.2  | 100%        | 3.7     | 100%  | KX772777.1  |
| <a href="#">Salmonella enterica strain Z319S plasmid pHZ319S</a>                                                                                                                     | 36.2      | 36.2  | 100%        | 3.7     | 100%  | KX267482.1  |
| <a href="#">Salmonella enterica strain SH36 plasmid pSH36</a>                                                                                                                        | 36.2      | 36.2  | 100%        | 3.7     | 100%  | KX267480.1  |
| <a href="#">Escherichia coli strain CO02-121 plasmid pCO02-121, complete sequence</a>                                                                                                | 36.2      | 36.2  | 100%        | 3.7     | 100%  | KJ647721.2  |
| <a href="#">Escherichia coli strain MCR1_NJ plasmid pMCR1-NJ-mcr4, complete sequence</a>                                                                                             | 36.2      | 36.2  | 100%        | 3.7     | 100%  | KJ447769.1  |
| <a href="#">Escherichia coli strain OW3E1 plasmid pOW3E1, complete sequence</a>                                                                                                      | 36.2      | 36.2  | 100%        | 3.7     | 100%  | KJ129783.1  |
| <a href="#">Escherichia coli strain S38 plasmid pS38, complete sequence</a>                                                                                                          | 36.2      | 36.2  | 100%        | 3.7     | 100%  | KJ129792.1  |
| <a href="#">Klebsiella pneumoniae strain KP-6894 plasmid pMCR1-2-II, complete sequence</a>                                                                                           | 36.2      | 36.2  | 100%        | 3.7     | 100%  | KX263309.1  |
| <a href="#">Escherichia coli strain EC2 plasmid pEC2-4, complete sequence</a>                                                                                                        | 36.2      | 36.2  | 100%        | 3.7     | 100%  | CP016184.1  |
| <a href="#">Escherichia coli isolate W2 isolate genome assembly, plasmid, pW2-mcr</a>                                                                                                | 36.2      | 36.2  | 100%        | 3.7     | 100%  | L7838201.1  |
| <a href="#">Escherichia coli strain ICBEC13AM plasmid pICBEC13AM, complete sequence</a>                                                                                              | 36.2      | 36.2  | 100%        | 3.7     | 100%  | KY770026.1  |
| <a href="#">Escherichia coli strain ICBEC3AM plasmid pICBEC3AM, complete sequence</a>                                                                                                | 36.2      | 36.2  | 100%        | 3.7     | 100%  | KY770024.1  |
| <a href="#">Escherichia coli strain ICBEC2AM plasmid pICBEC2AM, complete sequence</a>                                                                                                | 36.2      | 36.2  | 100%        | 3.7     | 100%  | KY770023.1  |
| <a href="#">Escherichia coli strain WCHEC1604 plasmid pMCR_WCHEC1604-mcr4, complete sequence</a>                                                                                     | 36.2      | 36.2  | 100%        | 3.7     | 100%  | KX982849.1  |
| <a href="#">Escherichia coli strain W6-6 phosphoethanolamine-lipid A transferase MCR-1 (mcr-1) gene, partial cds</a>                                                                 | 36.2      | 36.2  | 100%        | 3.7     | 100%  | KV218739.1  |
| <a href="#">Escherichia coli strain W2-5 phosphoethanolamine-lipid A transferase MCR-1 (mcr-1) gene, partial cds</a>                                                                 | 36.2      | 36.2  | 100%        | 3.7     | 100%  | KV218738.1  |
| <a href="#">Escherichia coli strain BE2-5 phosphoethanolamine-lipid A transferase MCR-1 (mcr-1) gene, partial cds</a>                                                                | 36.2      | 36.2  | 100%        | 3.7     | 100%  | KV218737.1  |
| <a href="#">Escherichia coli plasmid pMR15-131_2 DNA, complete genome, strain MRV15-131</a>                                                                                          | 36.2      | 36.2  | 100%        | 3.7     | 100%  | AF017629.1  |
| <a href="#">Escherichia coli plasmid pMR15-117_2 DNA, complete genome, strain MRV15-117</a>                                                                                          | 36.2      | 36.2  | 100%        | 3.7     | 100%  | AF017619.1  |
| <a href="#">Escherichia coli plasmid pMR15-002_4 DNA, complete genome, strain 20E-P-124</a>                                                                                          | 36.2      | 36.2  | 100%        | 3.7     | 100%  | AF017614.1  |
| <a href="#">Escherichia coli DNA genomic structure surrounding mcr-1 gene, strain RVU2912C-1</a>                                                                                     | 36.2      | 36.2  | 100%        | 3.7     | 100%  | LC228070.1  |
| <a href="#">Escherichia coli plasmid pCT2378 DNA, complete sequence, strain KT2378</a>                                                                                               | 36.2      | 36.2  | 100%        | 3.7     | 100%  | LC227558.1  |
| <a href="#">Escherichia coli strain HK9H_MCR_161114268_EC phosphoethanolamine lipid A transferase (mcr1) gene, mcr1.0 allele, complete cds</a>                                       | 36.2      | 36.2  | 100%        | 3.7     | 100%  | KY889071.1  |
| <a href="#">Escherichia coli strain HK9H_MCR_161103180_EC phosphoethanolamine lipid A transferase (mcr1) gene, mcr1.0 allele, complete cds</a>                                       | 36.2      | 36.2  | 100%        | 3.7     | 100%  | KY889070.1  |
| <a href="#">Escherichia coli strain pPY1 plasmid pPY1, complete sequence</a>                                                                                                         | 36.2      | 36.2  | 100%        | 3.7     | 100%  | KX711708.1  |
| <a href="#">Escherichia coli strain EC590, complete genome</a>                                                                                                                       | 36.2      | 108   | 100%        | 3.7     | 100%  | CP016182.2  |
| <a href="#">Citrobacter braaki strain CA-26 plasmid pCA-26, complete sequence</a>                                                                                                    | 36.2      | 36.2  | 100%        | 3.7     | 100%  | KX824633.1  |
| <a href="#">Escherichia coli strain GD53 plasmid pGD53-3, complete sequence</a>                                                                                                      | 36.2      | 36.2  | 100%        | 3.7     | 100%  | KY075662.1  |
| <a href="#">Escherichia coli strain GD95 plasmid pGD95-3, complete sequence</a>                                                                                                      | 36.2      | 36.2  | 100%        | 3.7     | 100%  | KY075661.1  |
| <a href="#">Escherichia coli strain WH07 plasmid pWH07-3, complete sequence</a>                                                                                                      | 36.2      | 36.2  | 100%        | 3.7     | 100%  | KY075660.1  |
| <a href="#">Escherichia coli strain WH09 plasmid pWH09-3, complete sequence</a>                                                                                                      | 36.2      | 36.2  | 100%        | 3.7     | 100%  | KY075657.1  |
| <a href="#">Escherichia coli strain WH13 plasmid pWH13-4, complete sequence</a>                                                                                                      | 36.2      | 36.2  | 100%        | 3.7     | 100%  | KY075656.1  |
| <a href="#">Escherichia coli strain Lishui142 plasmid pLishui142-1, complete sequence</a>                                                                                            | 36.2      | 36.2  | 100%        | 3.7     | 100%  | KY075654.1  |
| <a href="#">Escherichia coli strain GD23 plasmid pGD23-3, complete sequence</a>                                                                                                      | 36.2      | 36.2  | 100%        | 3.7     | 100%  | KY075651.1  |
| <a href="#">Escherichia coli strain GD17 plasmid pGD17-2, complete sequence</a>                                                                                                      | 36.2      | 36.2  | 100%        | 3.7     | 100%  | KY075650.1  |
| <a href="#">Escherichia coli FS13228 contig 3 genomic sequence</a>                                                                                                                   | 36.2      | 36.2  | 100%        | 3.7     | 100%  | KY421936.1  |
| <a href="#">Escherichia coli strain ST101 phosphoethanolamine transferase (mcr-1.8) gene, complete cds</a>                                                                           | 36.2      | 36.2  | 100%        | 3.7     | 100%  | KY883842.1  |
| <a href="#">Escherichia coli strain C2-007R phosphoethanolamine-lipid A transferase (mcr-1) gene, partial cds</a>                                                                    | 36.2      | 36.2  | 100%        | 3.7     | 100%  | KV013597.1  |
| <a href="#">Escherichia coli strain MDR_66 plasmid pMCR1-NY, complete sequence</a>                                                                                                   | 36.2      | 36.2  | 100%        | 3.7     | 100%  | CP019908.1  |
| <a href="#">Cloning vector pGDP2, complete sequence</a>                                                                                                                              | 36.2      | 36.2  | 100%        | 3.7     | 100%  | KX889086.1  |
| <a href="#">Salmonella enterica subsp. enterica serovar Typhimurium Y1_14P053 pMCR16_P053 mcr-1 gene for phosphoethanolamine-lipid A transferase MCR-1.6, complete CDS</a>           | 36.2      | 36.2  | 100%        | 3.7     | 100%  | NG_052893.1 |
| <a href="#">Escherichia coli HcN897 pHEN897 mcr-1 gene for phosphoethanolamine-lipid A transferase MCR-1.3, complete CDS</a>                                                         | 36.2      | 36.2  | 100%        | 3.7     | 100%  | NG_052891.1 |
| <a href="#">Escherichia coli WCHEC1605 mcr-1 gene for phosphoethanolamine-lipid A transferase MCR-1.4, complete CDS</a>                                                              | 36.2      | 36.2  | 100%        | 3.7     | 100%  | NG_052894.1 |
| <a href="#">Escherichia coli 1258822 mcr-1 gene for phosphoethanolamine-lipid A transferase MCR-1.5, complete CDS</a>                                                                | 36.2      | 36.2  | 100%        | 3.7     | 100%  | NG_052893.1 |
| <a href="#">Escherichia coli strain EC111 plasmid pEC111, complete sequence</a>                                                                                                      | 36.2      | 36.2  | 100%        | 3.7     | 100%  | KY471146.1  |
| <a href="#">Escherichia coli strain EC019 plasmid pEC019, complete sequence</a>                                                                                                      | 36.2      | 36.2  | 100%        | 3.7     | 100%  | KY471145.1  |
| <a href="#">Escherichia coli strain EC005 plasmid pEC005, complete sequence</a>                                                                                                      | 36.2      | 36.2  | 100%        | 3.7     | 100%  | KY471144.1  |
| <a href="#">Escherichia coli strain WCHEC1604 phosphoethanolamine-lipid A transferase MCR-17 (mcr-1) gene, mcr-1.7 allele, complete cds</a>                                          | 36.2      | 36.2  | 100%        | 3.7     | 100%  | KX488488.1  |
| <a href="#">Escherichia coli Para (papA), hypothetical protein (pCF132_02), hypothetical protein (pCF132_03), Mor1 (mcr1), and Pap2 (pap2) genes, complete cds</a>                   | 36.2      | 36.2  | 100%        | 3.7     | 100%  | KX560359.1  |
| <a href="#">Escherichia coli Para (papA), hypothetical protein (pCF1-2_02), hypothetical protein (pCF1-2_03), Mor1 (mcr1), and Pap2 (pap2) genes, complete cds</a>                   | 36.2      | 36.2  | 100%        | 3.7     | 100%  | KX560357.1  |
| <a href="#">Escherichia coli Para (papA), hypothetical protein (pCF131_02), hypothetical protein (pCF131_03), Mor1 (mcr1), and Pap2 (pap2) genes, complete cds</a>                   | 36.2      | 36.2  | 100%        | 3.7     | 100%  | KX242348.1  |
| <a href="#">Escherichia coli strain A434-59 plasmid phosphoethanolamine-lipid A transferase MCR-1 (mcr-1) gene, complete cds</a>                                                     | 36.2      | 36.2  | 100%        | 3.7     | 100%  | KX592872.1  |
| <a href="#">Escherichia coli plasmid pEC_04HAE12, complete sequence</a>                                                                                                              | 36.2      | 36.2  | 100%        | 3.7     | 100%  | KX850666.1  |
| <a href="#">Salmonella Typhimurium strain HSHL11 plasmid pSHL11-MCR1, complete sequence</a>                                                                                          | 36.2      | 36.2  | 100%        | 3.7     | 100%  | KY012276.1  |
| <a href="#">Escherichia coli strain 19HAE25 plasmid pEC_19HAE25, complete sequence</a>                                                                                               | 36.2      | 36.2  | 100%        | 3.7     | 100%  | KY012275.1  |
| <a href="#">Escherichia coli strain 27COE18 plasmid pEC_27COE18, complete sequence</a>                                                                                               | 36.2      | 36.2  | 100%        | 3.7     | 100%  | KY012274.1  |
| <a href="#">Escherichia coli strain 20COE13 plasmid pEC_20COE13, complete sequence</a>                                                                                               | 36.2      | 36.2  | 100%        | 3.7     | 100%  | KY012273.1  |
| <a href="#">Salmonella enterica subsp. enterica strain NG14043 plasmid pNG14043, complete sequence</a>                                                                               | 36.2      | 36.2  | 100%        | 3.7     | 100%  | KY120364.1  |
| <a href="#">Salmonella enterica subsp. enterica strain C214 plasmid pC214, complete sequence</a>                                                                                     | 36.2      | 36.2  | 100%        | 3.7     | 100%  | KY120363.1  |
| <a href="#">Escherichia coli strain MRSN346355 plasmid pMRSN346355_65.5, complete sequence</a>                                                                                       | 36.2      | 36.2  | 100%        | 3.7     | 100%  | CP018124.1  |
| <a href="#">Escherichia coli strain MRSN346338 plasmid pMRSN346338_64.5, complete sequence</a>                                                                                       | 36.2      | 36.2  | 100%        | 3.7     | 100%  | CP018118.1  |
| <a href="#">Escherichia coli strain MRSN346595 plasmid pMRSN346595_64.5, complete sequence</a>                                                                                       | 36.2      | 36.2  | 100%        | 3.7     | 100%  | CP018112.1  |
| <a href="#">Escherichia coli strain MRSN352231 plasmid pMR0716_mcr1, complete sequence</a>                                                                                           | 36.2      | 36.2  | 100%        | 3.7     | 100%  | CP018109.1  |
| <a href="#">Escherichia coli nHE_mcr-1_pap2_ydA_topB genes for relaxase, phosphoethanolamine transferase, putative PAP family transmembrane protein, hemolysin activation pr</a>     | 36.2      | 36.2  | 100%        | 3.7     | 100%  | LC191501.2  |
| <a href="#">Klebsiella pneumoniae strain WCHKP1511 plasmid pMCR_1511, complete sequence</a>                                                                                          | 36.2      | 36.2  | 100%        | 3.7     | 100%  | KX377410.1  |
| <a href="#">Cronobacter sakazakii strain WF-5-19C plasmid pWF-5-19C_mcr-1, complete sequence</a>                                                                                     | 36.2      | 36.2  | 100%        | 3.7     | 100%  | KX505142.1  |
| <a href="#">Escherichia coli strain WF-5-19 plasmid pWF-5-19, partial sequence</a>                                                                                                   | 36.2      | 36.2  | 100%        | 3.7     | 100%  | KX505141.1  |
| <a href="#">Escherichia coli strain E15017_00 plasmid pE15017_00, complete sequence</a>                                                                                              | 36.2      | 36.2  | 100%        | 3.7     | 100%  | KX772778.1  |
| <a href="#">Escherichia coli transposase (hnpA), MCR-1 (mcr-1), hypothetical protein, and transcriptional regulator (ydfG) genes, complete cds</a>                                   | 36.2      | 36.2  | 100%        | 3.7     | 100%  | KX886345.1  |
| <a href="#">Salmonella enterica strain SH138 plasmid pSH138</a>                                                                                                                      | 36.2      | 36.2  | 100%        | 3.7     | 100%  | KX267481.1  |
| <a href="#">Escherichia coli strain ICBEC7P plasmid pICBEC7Pmcr, complete sequence</a>                                                                                               | 36.2      | 36.2  | 100%        | 3.7     | 100%  | CP017248.1  |
| <a href="#">Escherichia coli strain 210221272 plasmid pSL121, complete sequence</a>                                                                                                  | 36.2      | 36.2  | 100%        | 3.7     | 100%  | CP016409.1  |
| <a href="#">Escherichia coli strain GD-8 plasmid pCGD-8-33, complete sequence</a>                                                                                                    | 36.2      | 36.2  | 100%        | 3.7     | 100%  | KX264343.1  |
| <a href="#">Escherichia coli strain JS-61 plasmid pECJS-61-63, complete sequence</a>                                                                                                 | 36.2      | 36.2  | 100%        | 3.7     | 100%  | KX264342.1  |
| <a href="#">Escherichia coli strain JS-B60 plasmid pECJS-B60-267, complete sequence</a>                                                                                              | 36.2      | 36.2  | 100%        | 3.7     | 100%  | KX264341.1  |
| <a href="#">Escherichia coli strain NDM132 plasmid pIA1 insertion sequence ISAp11 integrase (int) gene, complete cds, mcr-1 (mcr-1) and hypothetical protein genes, complete cds</a> | 36.2      | 36.2  | 100%        | 3.7     | 100%  | KX458104.1  |
| <a href="#">Klebsiella pneumoniae strain KP-6884 unnameds5_mcr-1 gene for phosphoethanolamine-lipid A transferase MCR-1.0, complete CDS</a>                                          | 36.2      | 36.2  | 100%        | 3.7     | 100%  | NG_051170.1 |
| <a href="#">Escherichia coli strain O177:H21 plasmid unnameds4, complete sequence</a>                                                                                                | 36.2      | 72.4  | 100%        | 3.7     | 100%  | CP016550.1  |
| <a href="#">Escherichia coli plasmid unnameds1, complete sequence</a>                                                                                                                | 36.2      | 36.2  | 100%        | 3.7     | 100%  | KX628899.1  |

Figure S2. Cont.

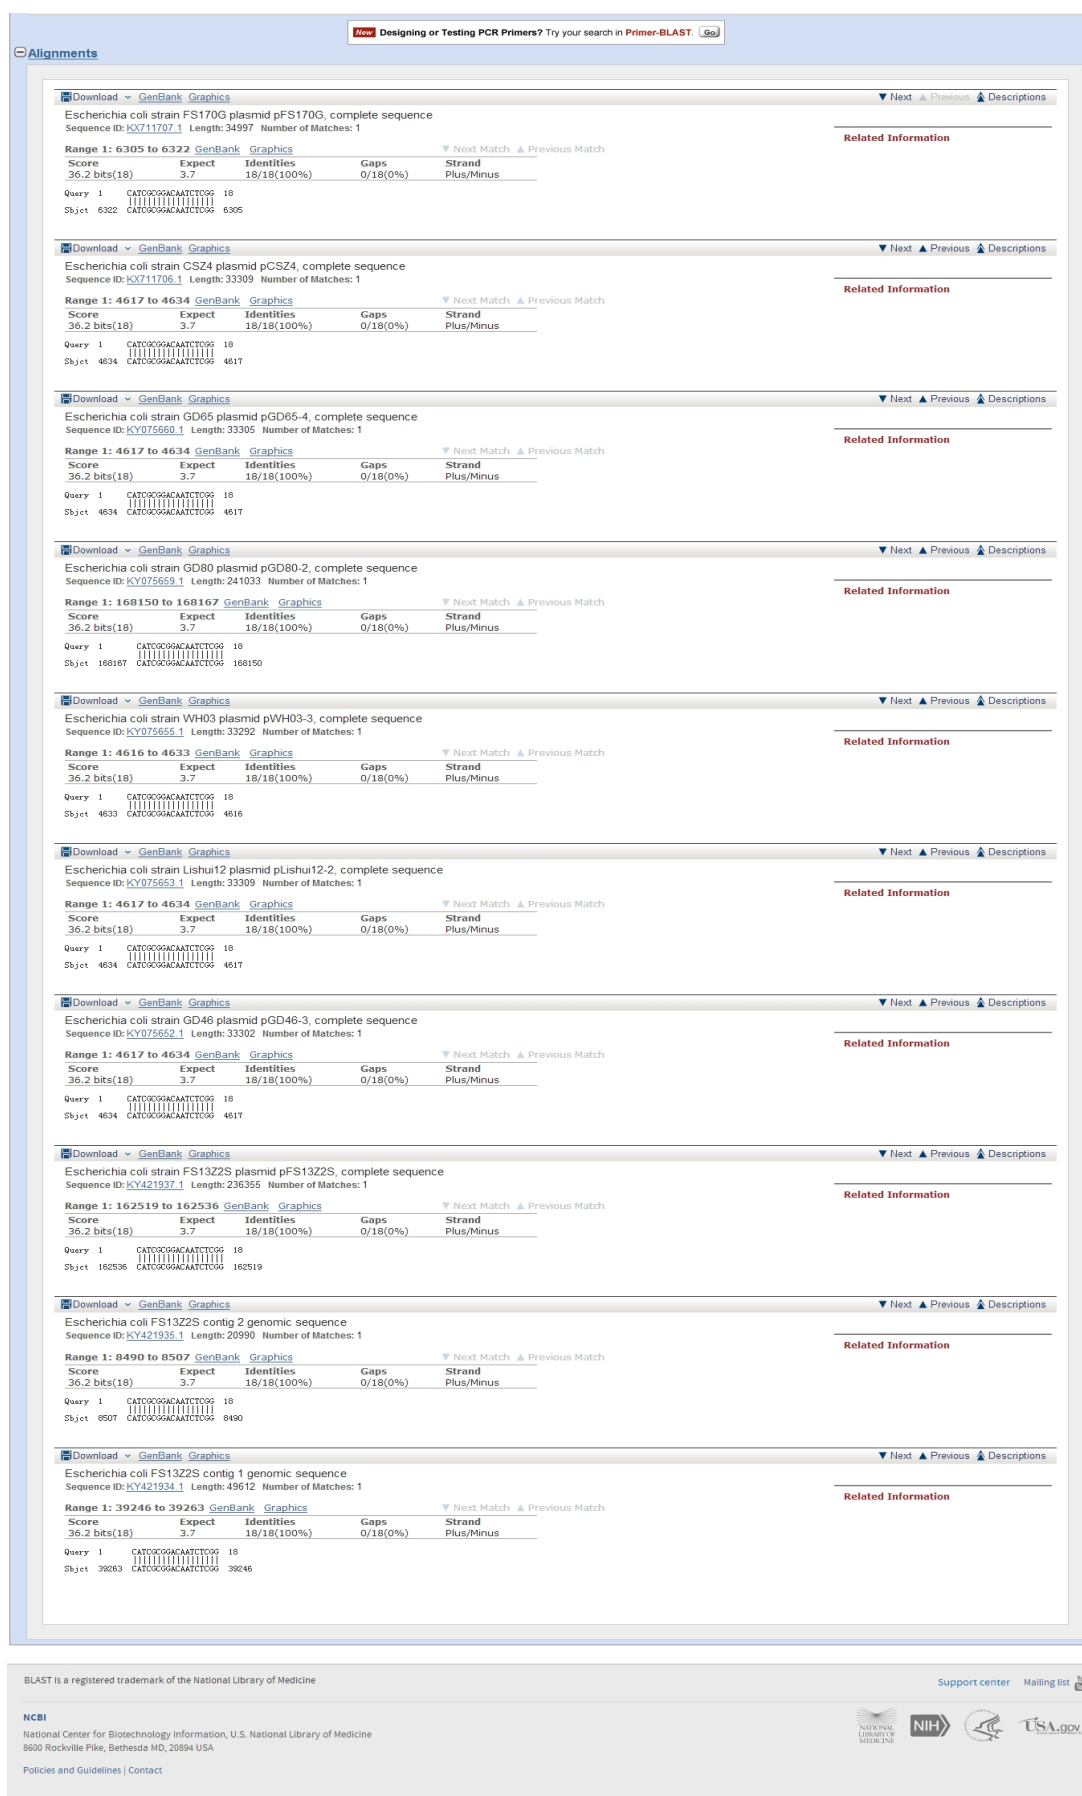

Figure S2. BLASTN analysis of primer M-F.

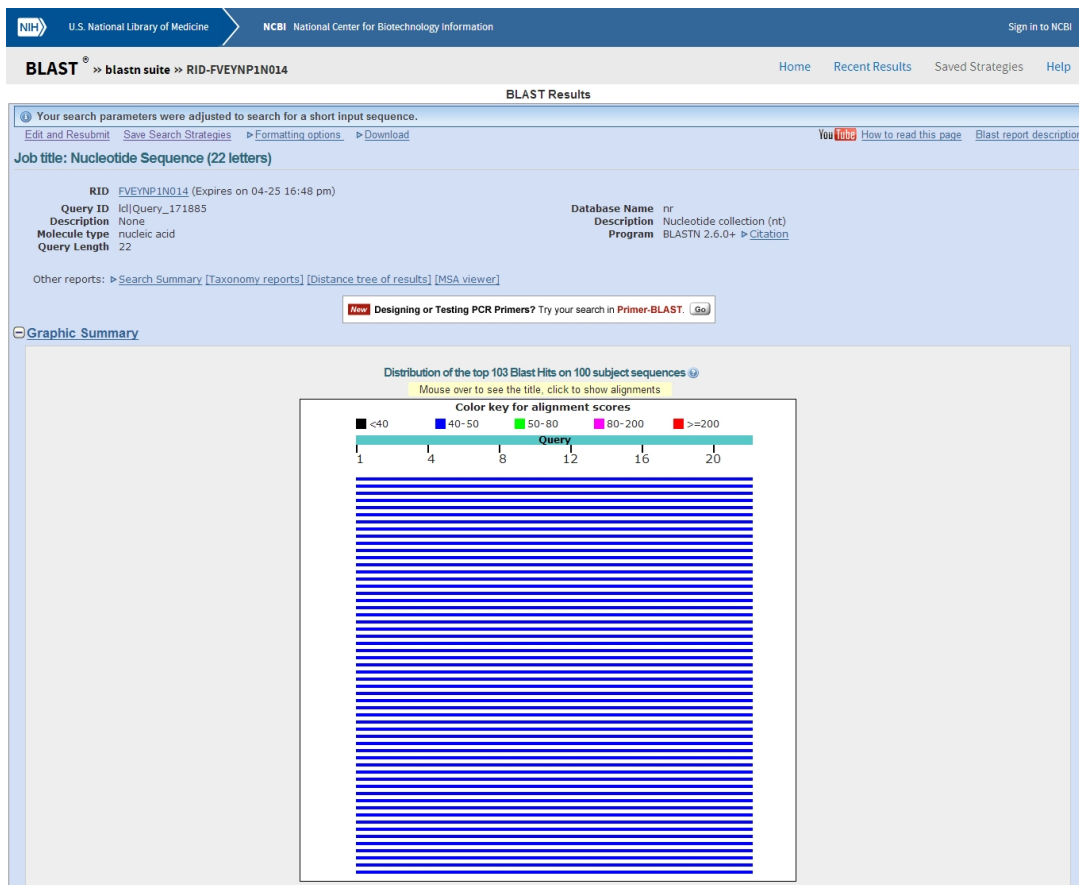

Figure S3. Cont.

Descriptions

Sequences producing significant alignments:

Select All | None Selected 0

Alignments | Overview | Grid/Map | Details | Distance tree of results

| Description                                                                                                                                                          | Max score | Total score | Query cover | E value | Ident | Accession   |
|----------------------------------------------------------------------------------------------------------------------------------------------------------------------|-----------|-------------|-------------|---------|-------|-------------|
| Escherichia coli isolate W2 isolate genome assembly, plasmid pW2-mcr                                                                                                 | 44.1      | 44.1        | 100%        | 0.023   | 100%  | LT838201.1  |
| Escherichia coli strain ICBEC13AM plasmid pICBEC13AM, complete sequence                                                                                              | 44.1      | 44.1        | 100%        | 0.023   | 100%  | KY779025.1  |
| Escherichia coli strain ICBEC13AM plasmid pICBEC13M, complete sequence                                                                                               | 44.1      | 44.1        | 100%        | 0.023   | 100%  | KY779024.1  |
| Escherichia coli strain ICBEC24M plasmid pICBEC24M, complete sequence                                                                                                | 44.1      | 44.1        | 100%        | 0.023   | 100%  | KY779023.1  |
| Escherichia coli strain ICBEC1504 plasmid pMCR_WCHC1504-enc4, complete sequence                                                                                      | 44.1      | 44.1        | 100%        | 0.023   | 100%  | KY858248.1  |
| Escherichia coli strain i05-6 phosphoethanolamine-lysid A transferase MCR-1 (mor-1) gene, partial cds                                                                | 44.1      | 44.1        | 100%        | 0.023   | 100%  | KY218739.1  |
| Escherichia coli strain W2-5 phosphoethanolamine-lysid A transferase MCR-1 (mor-1) gene, partial cds                                                                 | 44.1      | 44.1        | 100%        | 0.023   | 100%  | KY218738.1  |
| Escherichia coli strain BE2-5 phosphoethanolamine-lysid A transferase MCR-1 (mor-1) gene, partial cds                                                                | 44.1      | 44.1        | 100%        | 0.023   | 100%  | KY218737.1  |
| Escherichia coli plasmid pMRV15-117_2 DNA, complete genome, strain MRV15-131                                                                                         | 44.1      | 44.1        | 100%        | 0.023   | 100%  | AF017502.1  |
| Escherichia coli plasmid pMRV15-117_2 DNA, complete genome, strain MRV15-117                                                                                         | 44.1      | 44.1        | 100%        | 0.023   | 100%  | AF017519.1  |
| Escherichia coli plasmid pMRV15-202_4 DNA, complete genome, strain 20Ec-P-124                                                                                        | 44.1      | 44.1        | 100%        | 0.023   | 100%  | AF017514.1  |
| Escherichia coli DNA, genomic structure surrounding mor-1 gene, strain RYU2012C-1                                                                                    | 44.1      | 44.1        | 100%        | 0.023   | 100%  | LC228709.1  |
| Escherichia coli plasmid pK22728 DNA, complete sequence, strain KT2278                                                                                               | 44.1      | 44.1        | 100%        | 0.023   | 100%  | LC227558.1  |
| Escherichia coli strain HKSH_MCR_151114269_EC phosphoethanolamine-lysid A transferase (mor1) gene, mor1 8 allele, complete cds                                       | 44.1      | 44.1        | 100%        | 0.023   | 100%  | KY685071.1  |
| Escherichia coli strain HKSH_MCR_151113180_EC phosphoethanolamine-lysid A transferase (mor1) gene, mor1 8 allele, complete cds                                       | 44.1      | 44.1        | 100%        | 0.023   | 100%  | KY685070.1  |
| Escherichia coli strain pPY1 plasmid pPY1, complete sequence                                                                                                         | 44.1      | 44.1        | 100%        | 0.023   | 100%  | KJ711708.1  |
| Escherichia coli strain EC595, complete genome                                                                                                                       | 44.1      | 132         | 100%        | 0.023   | 100%  | CP010182.2  |
| Citrobacter braconis strain CA-26 plasmid pCA-26, complete sequence                                                                                                  | 44.1      | 44.1        | 100%        | 0.023   | 100%  | KJ524533.1  |
| Escherichia coli strain GD53 plasmid pGD53-3, complete sequence                                                                                                      | 44.1      | 44.1        | 100%        | 0.023   | 100%  | KJ075862.1  |
| Escherichia coli strain GD55 plasmid pGD55-3, complete sequence                                                                                                      | 44.1      | 44.1        | 100%        | 0.023   | 100%  | KJ075861.1  |
| Escherichia coli strain WH07 plasmid pWH07-3, complete sequence                                                                                                      | 44.1      | 44.1        | 100%        | 0.023   | 100%  | KJ075858.1  |
| Escherichia coli strain WH09 plasmid pWH09-3, complete sequence                                                                                                      | 44.1      | 44.1        | 100%        | 0.023   | 100%  | KJ075857.1  |
| Escherichia coli strain WH13 plasmid pWH13-4, complete sequence                                                                                                      | 44.1      | 44.1        | 100%        | 0.023   | 100%  | KJ075856.1  |
| Escherichia coli strain Lshu142 plasmid pLshu142-1, complete sequence                                                                                                | 44.1      | 44.1        | 100%        | 0.023   | 100%  | KJ075854.1  |
| Escherichia coli strain GD23 plasmid pGD23-3, complete sequence                                                                                                      | 44.1      | 44.1        | 100%        | 0.023   | 100%  | KJ075853.1  |
| Escherichia coli strain GD17 plasmid pGD17-2, complete sequence                                                                                                      | 44.1      | 44.1        | 100%        | 0.023   | 100%  | KJ075850.1  |
| Escherichia coli strain FS13228 contig_3 genomic sequence                                                                                                            | 44.1      | 44.1        | 100%        | 0.023   | 100%  | KY421936.1  |
| Escherichia coli strain ST101 phosphoethanolamine transferase (mor-1) gene, complete cds                                                                             | 44.1      | 44.1        | 100%        | 0.023   | 100%  | KY683842.1  |
| Escherichia coli strain C2-9075 phosphoethanolamine-lysid A transferase (mor-1) gene, partial cds                                                                    | 44.1      | 44.1        | 100%        | 0.023   | 100%  | KY013597.1  |
| Escherichia coli strain MORL_55 plasmid pMCR14IV, complete sequence                                                                                                  | 44.1      | 44.1        | 100%        | 0.023   | 100%  | CP018908.1  |
| Cloning vector pGDP2, complete sequence                                                                                                                              | 44.1      | 44.1        | 100%        | 0.023   | 100%  | KJ859085.1  |
| Salmonella enterica subsp. enterica serovar Typhimurium Y1_14P953 pMCR19_P053 mor-1 gene for phosphoethanolamine-lysid A transferase MCR-1.6, complete CDS           | 44.1      | 44.1        | 100%        | 0.023   | 100%  | NC_052983.3 |
| Escherichia coli strain H4887 pMCR1867 mor-1 gene for phosphoethanolamine-lysid A transferase MCR-1.3, complete CDS                                                  | 44.1      | 44.1        | 100%        | 0.023   | 100%  | NC_052981.1 |
| Escherichia coli strain WCHC1505 mor-1 gene for phosphoethanolamine-lysid A transferase MCR-1.4, complete CDS                                                        | 44.1      | 44.1        | 100%        | 0.023   | 100%  | NC_052984.3 |
| Escherichia coli strain 1256822 mor-1 gene for phosphoethanolamine-lysid A transferase MCR-1.5, complete CDS                                                         | 44.1      | 44.1        | 100%        | 0.023   | 100%  | NC_052982.3 |
| Escherichia coli strain EC111 plasmid pEC111, complete sequence                                                                                                      | 44.1      | 44.1        | 100%        | 0.023   | 100%  | KY471146.1  |
| Escherichia coli strain EC019 plasmid pEC019, complete sequence                                                                                                      | 44.1      | 44.1        | 100%        | 0.023   | 100%  | KY471145.1  |
| Escherichia coli strain EC006 plasmid pEC006, complete sequence                                                                                                      | 44.1      | 44.1        | 100%        | 0.023   | 100%  | KY471144.1  |
| Escherichia coli strain WCHC1504 phosphoethanolamine-lysid A transferase MCR-1.7 (mor-1) gene, mor-1 7 allele, complete cds                                          | 44.1      | 44.1        | 100%        | 0.023   | 100%  | KY488489.1  |
| Escherichia coli PaK1 (papA), hypothetical protein (pCF132_02), hypothetical protein (pCF132_03), Mor1 (mor1), and Pap2 (pap2) genes, complete cds                   | 44.1      | 44.1        | 100%        | 0.023   | 100%  | KY555399.1  |
| Escherichia coli PaK1 (papA), hypothetical protein (pCF1-2_02), hypothetical protein (pCF1-2_03), Mor1 (mor1), and Pap2 (pap2) genes, complete cds                   | 44.1      | 44.1        | 100%        | 0.023   | 100%  | KY555398.1  |
| Escherichia coli PaK1 (papA), hypothetical protein (pCF131_02), Mor1 (mor1), and Pap2 (pap2) genes, complete cds                                                     | 44.1      | 44.1        | 100%        | 0.023   | 100%  | KY555387.1  |
| Escherichia coli strain A434-59 plasmid phosphoethanolamine-lysid A transferase MCR-1 (mor-1) gene, complete cds                                                     | 44.1      | 44.1        | 100%        | 0.023   | 100%  | KJ242448.1  |
| Escherichia coli plasmid pEC_04HAE12, complete sequence                                                                                                              | 44.1      | 44.1        | 100%        | 0.023   | 100%  | KJ592672.1  |
| Salmonella Typhimurium strain H9Hc_J1 plasmid pH9Hc_J1-MCR1, complete sequence                                                                                       | 44.1      | 44.1        | 100%        | 0.023   | 100%  | KJ856066.1  |
| Escherichia coli strain 18H4E25 plasmid pEC_18H4E25, complete sequence                                                                                               | 44.1      | 44.1        | 100%        | 0.023   | 100%  | KY019278.1  |
| Escherichia coli strain Z7COE18 plasmid pEC_Z7COE18, complete sequence                                                                                               | 44.1      | 44.1        | 100%        | 0.023   | 100%  | KY019275.1  |
| Escherichia coli strain Z0COE13 plasmid pEC_Z0COE13, complete sequence                                                                                               | 44.1      | 44.1        | 100%        | 0.023   | 100%  | KY019274.1  |
| Salmonella enterica subsp. enterica strain NG14543 plasmid pNG14543, complete sequence                                                                               | 44.1      | 44.1        | 100%        | 0.023   | 100%  | KY120364.1  |
| Salmonella enterica subsp. enterica strain C214 plasmid pC214, complete sequence                                                                                     | 44.1      | 44.1        | 100%        | 0.023   | 100%  | KY120363.1  |
| Escherichia coli strain MRSN344635 plasmid pMRSN344635_45.5, complete sequence                                                                                       | 44.1      | 44.1        | 100%        | 0.023   | 100%  | CP018124.1  |
| Escherichia coli strain MRSN344638 plasmid pMRSN344638_44.5, complete sequence                                                                                       | 44.1      | 44.1        | 100%        | 0.023   | 100%  | CP018118.1  |
| Escherichia coli strain MRSN344595 plasmid pMRSN344595_44.5, complete sequence                                                                                       | 44.1      | 44.1        | 100%        | 0.023   | 100%  | CP018112.1  |
| Escherichia coli strain MRSN32221 plasmid pMR0716_mor1, complete sequence                                                                                            | 44.1      | 44.1        | 100%        | 0.023   | 100%  | CP018106.1  |
| Escherichia coli mH6_mor-1, pap2, ynfA, topB genes for relaxase, phosphoethanolamine transferase, putative PAP family transmembrane protein, hemolysin activation pr | 44.1      | 44.1        | 100%        | 0.023   | 100%  | LC191581.2  |
| Klebsiella pneumoniae strain WCHP1511 plasmid pMCR_1511, complete sequence                                                                                           | 44.1      | 44.1        | 100%        | 0.023   | 100%  | KJ372740.1  |
| Cropobacter sakazakii strain VF-5-19C plasmid pVF-5-19C_mor-1, complete sequence                                                                                     | 44.1      | 44.1        | 100%        | 0.023   | 100%  | KJ505142.1  |
| Escherichia coli strain VF-5-19 plasmid pVF-5-19, partial sequence                                                                                                   | 44.1      | 44.1        | 100%        | 0.023   | 100%  | KJ505141.1  |
| Escherichia coli strain E15017_00 plasmid pE15017_00, complete sequence                                                                                              | 44.1      | 44.1        | 100%        | 0.023   | 100%  | KY772778.1  |
| Escherichia coli transposase (tpaA), MCR-1 (mor-1), hypothetical protein, and transcriptional regulator (ydaA) genes, complete cds                                   | 44.1      | 44.1        | 100%        | 0.023   | 100%  | KJ888345.1  |
| Salmonella enterica strain SH138 plasmid pSH138, complete sequence                                                                                                   | 44.1      | 44.1        | 100%        | 0.023   | 100%  | KJ257481.1  |
| Escherichia coli strain ICBEC72 plasmid pICBEC72mor, complete sequence                                                                                               | 44.1      | 44.1        | 100%        | 0.023   | 100%  | CP017246.1  |
| Escherichia coli strain 21021272 plasmid pJy21, complete sequence                                                                                                    | 44.1      | 44.1        | 100%        | 0.023   | 100%  | CP016405.1  |
| Escherichia coli strain GD-8 plasmid pEGCD-8-23, complete sequence                                                                                                   | 44.1      | 44.1        | 100%        | 0.023   | 100%  | KJ254243.1  |
| Escherichia coli strain J9-41 plasmid pECJ9-41-43, complete sequence                                                                                                 | 44.1      | 44.1        | 100%        | 0.023   | 100%  | KJ254242.1  |
| Escherichia coli strain J9-890 plasmid pECJ9-890-297, complete sequence                                                                                              | 44.1      | 44.1        | 100%        | 0.023   | 100%  | KJ254241.1  |
| Escherichia coli strain HDM132 plasmid pJ1 insertion sequence IS491 integrase (inf) gene, complete cds, mor-1 (mor-1) and hypothetical protein genes, complete cds   | 44.1      | 44.1        | 100%        | 0.023   | 100%  | KJ458104.1  |
| Klebsiella pneumoniae KP-5884 unname45 mor-1 gene for phosphoethanolamine-lysid A transferase MCR-1.2, complete CDS                                                  | 44.1      | 44.1        | 100%        | 0.023   | 100%  | NC_061170.1 |
| Escherichia coli strain O177 H21 plasmid unname04, complete sequence                                                                                                 | 44.1      | 88.2        | 100%        | 0.023   | 100%  | CP016556.1  |
| Escherichia coli plasmid unname01, complete sequence                                                                                                                 | 44.1      | 44.1        | 100%        | 0.023   | 100%  | KJ252899.1  |
| Escherichia coli strain 59 plasmid pECJ9-59-244, complete sequence                                                                                                   | 44.1      | 44.1        | 100%        | 0.023   | 100%  | KJ084384.1  |
| Escherichia coli strain 61 plasmid pECJ9-61-63, complete sequence                                                                                                    | 44.1      | 44.1        | 100%        | 0.023   | 100%  | KJ084383.1  |
| Escherichia coli strain B85 plasmid pECJ9-B85-33, complete sequence                                                                                                  | 44.1      | 44.1        | 100%        | 0.023   | 100%  | KJ084382.1  |
| Escherichia coli strain B476 plasmid pB476-MCR-1, complete sequence                                                                                                  | 44.1      | 44.1        | 100%        | 0.023   | 100%  | KJ013549.1  |
| Escherichia coli strain B477 plasmid pB477-MCR-1, complete sequence                                                                                                  | 44.1      | 44.1        | 100%        | 0.023   | 100%  | KJ013539.1  |
| Escherichia coli strain ABC149 plasmid pABC149-MCR-1, complete sequence                                                                                              | 44.1      | 44.1        | 100%        | 0.023   | 100%  | KJ013538.1  |
| Klovera ascorbata strain WCH1410 plasmid pMCR_1410, complete sequence                                                                                                | 44.1      | 44.1        | 100%        | 0.023   | 100%  | KJ822754.1  |
| Escherichia coli strain KPR1 plasmid pKPR1-8E, complete sequence                                                                                                     | 44.1      | 44.1        | 100%        | 0.023   | 100%  | KJ924859.1  |
| Escherichia coli plasmid pK0467-3-8E, complete sequence                                                                                                              | 44.1      | 44.1        | 100%        | 0.023   | 100%  | KJ353730.1  |
| Escherichia coli strain H2289 plasmid pH2289, complete sequence                                                                                                      | 44.1      | 44.1        | 100%        | 0.023   | 100%  | KJ129784.1  |
| Escherichia coli strain S2_14 plasmid pS2_14-2, complete sequence                                                                                                    | 44.1      | 44.1        | 100%        | 0.023   | 100%  | CP016187.1  |
| Escherichia coli strain EC13 plasmid pEC13-1, complete sequence                                                                                                      | 44.1      | 44.1        | 100%        | 0.023   | 100%  | CP016186.1  |
| Escherichia coli strain EC5 plasmid pEC5-1, complete sequence                                                                                                        | 44.1      | 44.1        | 100%        | 0.023   | 100%  | CP016185.1  |
| Escherichia coli strain EC2_1 plasmid pEC2_1-4, complete sequence                                                                                                    | 44.1      | 44.1        | 100%        | 0.023   | 100%  | CP016183.1  |
| Escherichia coli strain F81705 plasmid pF81705, complete sequence                                                                                                    | 44.1      | 44.1        | 100%        | 0.023   | 100%  | KJ711707.1  |
| Escherichia coli strain CS24 plasmid pCS24, complete sequence                                                                                                        | 44.1      | 44.1        | 100%        | 0.023   | 100%  | KJ711706.1  |
| Escherichia coli strain GD65 plasmid pGD65-4, complete sequence                                                                                                      | 44.1      | 44.1        | 100%        | 0.023   | 100%  | KY075869.1  |
| Escherichia coli strain GD89 plasmid pGD89-2, complete sequence                                                                                                      | 44.1      | 44.1        | 100%        | 0.023   | 100%  | KY075868.1  |
| Escherichia coli strain WH03 plasmid pWH03-3, complete sequence                                                                                                      | 44.1      | 44.1        | 100%        | 0.023   | 100%  | KY075855.1  |
| Escherichia coli strain Lshu12 plasmid pLshu12-2, complete sequence                                                                                                  | 44.1      | 44.1        | 100%        | 0.023   | 100%  | KY075853.1  |
| Escherichia coli strain GD46 plasmid pGD46-3, complete sequence                                                                                                      | 44.1      | 44.1        | 100%        | 0.023   | 100%  | KY075852.1  |
| Escherichia coli strain F913225 plasmid pF913225, complete sequence                                                                                                  | 44.1      | 44.1        | 100%        | 0.023   | 100%  | KY421937.1  |
| Escherichia coli strain FS13228 contig_2 genomic sequence                                                                                                            | 44.1      | 44.1        | 100%        | 0.023   | 100%  | KY421936.1  |
| Escherichia coli strain FS13228 contig_1 genomic sequence                                                                                                            | 44.1      | 44.1        | 100%        | 0.023   | 100%  | KY421934.1  |
| Klebsiella pneumoniae strain KP2442 plasmid pKP2442_1c320, complete sequence                                                                                         | 44.1      | 44.1        | 100%        | 0.023   | 100%  | KJ434879.1  |
| Salmonella enterica subsp. enterica serovar Typhimurium strain YL14P953 plasmid pMCR16_P053, complete sequence                                                       | 44.1      | 44.1        | 100%        | 0.023   | 100%  | KJ352495.1  |
| Escherichia coli strain E4930-1 plasmid pE4930-1, complete sequence                                                                                                  | 44.1      | 44.1        | 100%        | 0.023   | 100%  | KY772781.1  |
| Escherichia coli strain E15004 plasmid pE15004, complete sequence                                                                                                    | 44.1      | 44.1        | 100%        | 0.023   | 100%  | KY772777.1  |
| Salmonella enterica strain Z1195 plasmid pH21195, complete sequence                                                                                                  | 44.1      | 44.1        | 100%        | 0.023   | 100%  | KJ257482.1  |
| Salmonella enterica strain SH36 plasmid pSH36, complete sequence                                                                                                     | 44.1      | 44.1        | 100%        | 0.023   | 100%  | KJ257480.1  |

Figure S3. Cont.

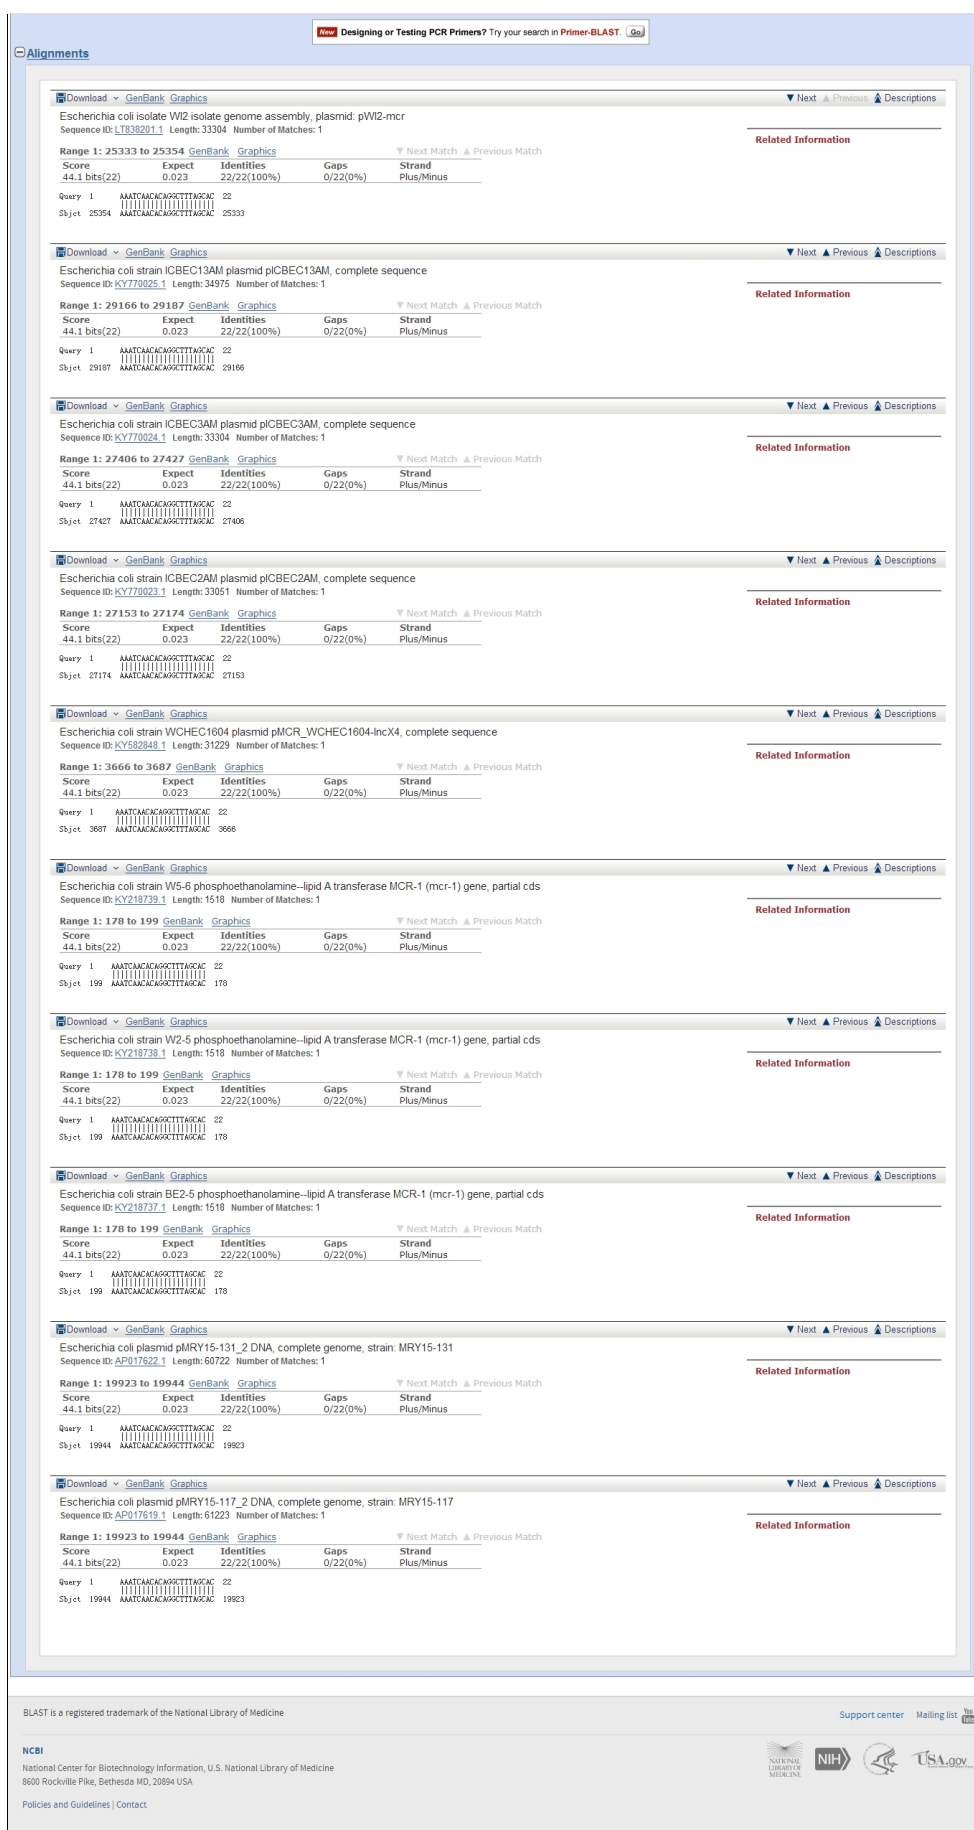

Figure S3. BLASTN analysis of primer M-R.

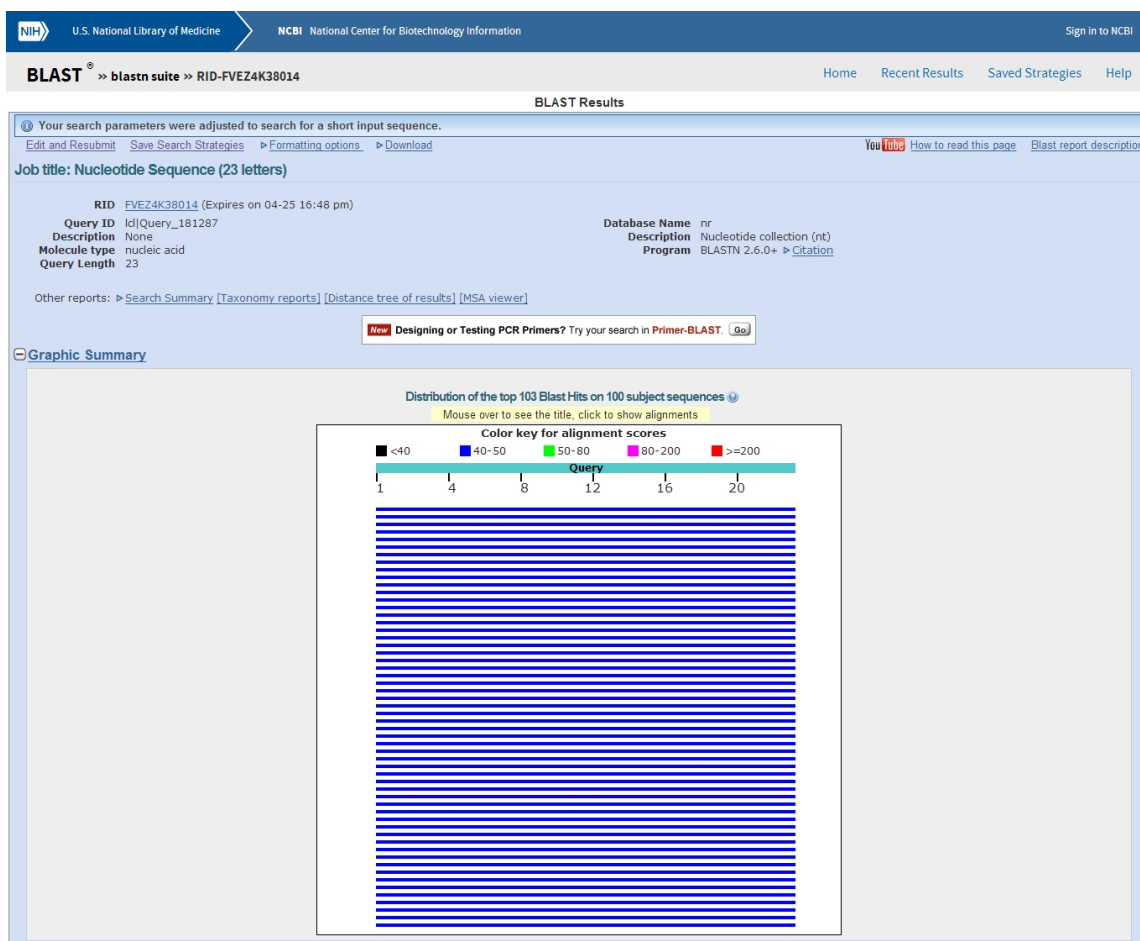

Figure S4. Cont.



Descriptions

Sequences producing significant alignments:

Select All None Selected 0

Alignments Download GenBank Graphics Distance tree of results

| Description                                                                                                                                                          | Max score | Total score | Query cover | E value | Ident | Accession   |
|----------------------------------------------------------------------------------------------------------------------------------------------------------------------|-----------|-------------|-------------|---------|-------|-------------|
| Escherichia coli isolate H92 isolate genome assembly plasmid p162-mor                                                                                                | 46.1      | 46.1        | 100%        | 0.006   | 100%  | LT838201.1  |
| Escherichia coli strain ICBEC13M plasmid pICBEC13M, complete sequence                                                                                                | 46.1      | 46.1        | 100%        | 0.006   | 100%  | KV772025.1  |
| Escherichia coli strain ICBEC13M plasmid pICBEC13M, complete sequence                                                                                                | 46.1      | 46.1        | 100%        | 0.006   | 100%  | KV772024.1  |
| Escherichia coli strain ICBEC13M plasmid pICBEC13M, complete sequence                                                                                                | 46.1      | 46.1        | 100%        | 0.006   | 100%  | KV772023.1  |
| Escherichia coli strain WCEC1904 plasmid pMCR_WCEC1604-mc04, complete sequence                                                                                       | 46.1      | 46.1        | 100%        | 0.006   | 100%  | KY56248.1   |
| Escherichia coli strain W5-6 phosphoethanolamine-lipid A transferase MCR-1 (mor-1) gene, partial cds                                                                 | 46.1      | 46.1        | 100%        | 0.006   | 100%  | KV218739.1  |
| Escherichia coli strain W5-6 phosphoethanolamine-lipid A transferase MCR-1 (mor-1) gene, partial cds                                                                 | 46.1      | 46.1        | 100%        | 0.006   | 100%  | KV218738.1  |
| Escherichia coli strain W5-6 phosphoethanolamine-lipid A transferase MCR-1 (mor-1) gene, partial cds                                                                 | 46.1      | 46.1        | 100%        | 0.006   | 100%  | KV218737.1  |
| Escherichia coli plasmid pMRY15-131_2 DNA, complete genome, strain MRY15-131                                                                                         | 46.1      | 46.1        | 100%        | 0.006   | 100%  | AP017622.1  |
| Escherichia coli plasmid pMRY15-117_2 DNA, complete genome, strain MRY15-117                                                                                         | 46.1      | 46.1        | 100%        | 0.006   | 100%  | AP017619.1  |
| Escherichia coli plasmid pMRY15-007_4 DNA, complete genome, strain 20E-P-124                                                                                         | 46.1      | 46.1        | 100%        | 0.006   | 100%  | AP017614.1  |
| Escherichia coli DNA, genomic structure surrounding mor-1 gene, strain RVJ2912C-1                                                                                    | 46.1      | 46.1        | 100%        | 0.006   | 100%  | LC228070.1  |
| Escherichia coli plasmid pKT2378 DNA, complete sequence, strain KT2378                                                                                               | 46.1      | 46.1        | 100%        | 0.006   | 100%  | LC227568.1  |
| Escherichia coli strain HKSH_MCR_161114268_EC phosphoethanolamine lipid A transferase (mor1) gene, mor1 B allele, complete cds                                       | 46.1      | 46.1        | 100%        | 0.006   | 100%  | KY895071.1  |
| Escherichia coli strain HKSH_MCR_1611013189_EC phosphoethanolamine lipid A transferase (mor1) gene, mor1 B allele, complete cds                                      | 46.1      | 46.1        | 100%        | 0.006   | 100%  | KY895070.1  |
| Escherichia coli strain pPY1 plasmid pPY1, complete sequence                                                                                                         | 46.1      | 46.1        | 100%        | 0.006   | 100%  | K0711708.1  |
| Escherichia coli strain FS1700 plasmid pFS1700, complete sequence                                                                                                    | 46.1      | 46.1        | 100%        | 0.006   | 100%  | K0711707.1  |
| Escherichia coli strain CB24 plasmid pCB24, complete sequence                                                                                                        | 46.1      | 46.1        | 100%        | 0.006   | 100%  | K0711706.1  |
| Escherichia coli strain EC590, complete genome                                                                                                                       | 46.1      | 138         | 100%        | 0.006   | 100%  | CP01682.2   |
| Clostridium braconii strain CA-26 plasmid pCA-26, complete sequence                                                                                                  | 46.1      | 46.1        | 100%        | 0.006   | 100%  | KY924833.1  |
| Escherichia coli strain GD53 plasmid pGD53-3, complete sequence                                                                                                      | 46.1      | 46.1        | 100%        | 0.006   | 100%  | KY075662.1  |
| Escherichia coli strain GD55 plasmid pGD55-3, complete sequence                                                                                                      | 46.1      | 46.1        | 100%        | 0.006   | 100%  | KY075661.1  |
| Escherichia coli strain GD55 plasmid pGD55-4, complete sequence                                                                                                      | 46.1      | 46.1        | 100%        | 0.006   | 100%  | KY075660.1  |
| Escherichia coli strain GD55 plasmid pGD55-3, complete sequence                                                                                                      | 46.1      | 46.1        | 100%        | 0.006   | 100%  | KY075659.1  |
| Escherichia coli strain GD55 plasmid pGD55-3, complete sequence                                                                                                      | 46.1      | 46.1        | 100%        | 0.006   | 100%  | KY075658.1  |
| Escherichia coli strain WH07 plasmid pWH07-3, complete sequence                                                                                                      | 46.1      | 46.1        | 100%        | 0.006   | 100%  | KY075657.1  |
| Escherichia coli strain WH09 plasmid pWH09-3, complete sequence                                                                                                      | 46.1      | 46.1        | 100%        | 0.006   | 100%  | KY075656.1  |
| Escherichia coli strain WH13 plasmid pWH13-4, complete sequence                                                                                                      | 46.1      | 46.1        | 100%        | 0.006   | 100%  | KY075655.1  |
| Escherichia coli strain WH03 plasmid pWH03-3, complete sequence                                                                                                      | 46.1      | 46.1        | 100%        | 0.006   | 100%  | KY075654.1  |
| Escherichia coli strain Liahui142 plasmid pLiahui142-1, complete sequence                                                                                            | 46.1      | 46.1        | 100%        | 0.006   | 100%  | KY075653.1  |
| Escherichia coli strain Liahui12 plasmid pLiahui12-2, complete sequence                                                                                              | 46.1      | 46.1        | 100%        | 0.006   | 100%  | KY075652.1  |
| Escherichia coli strain GD45 plasmid pGD45-3, complete sequence                                                                                                      | 46.1      | 46.1        | 100%        | 0.006   | 100%  | KY075651.1  |
| Escherichia coli strain GD23 plasmid pGD23-3, complete sequence                                                                                                      | 46.1      | 46.1        | 100%        | 0.006   | 100%  | KY075650.1  |
| Escherichia coli strain GD17 plasmid pGD17-2, complete sequence                                                                                                      | 46.1      | 46.1        | 100%        | 0.006   | 100%  | KY075649.1  |
| Escherichia coli strain FS1322S plasmid pFS1322S, complete sequence                                                                                                  | 46.1      | 46.1        | 100%        | 0.006   | 100%  | KY421937.1  |
| Escherichia coli FS1322S contig 3 genomic sequence                                                                                                                   | 46.1      | 46.1        | 100%        | 0.006   | 100%  | KY421936.1  |
| Escherichia coli FS1322S contig 2 genomic sequence                                                                                                                   | 46.1      | 46.1        | 100%        | 0.006   | 100%  | KY421935.1  |
| Escherichia coli FS1322S contig 1 genomic sequence                                                                                                                   | 46.1      | 46.1        | 100%        | 0.006   | 100%  | KY421934.1  |
| Escherichia coli strain BT101 phosphoethanolamine transferase (mor-1 B) gene, complete cds                                                                           | 46.1      | 46.1        | 100%        | 0.006   | 100%  | KY368342.1  |
| Escherichia coli strain C2-00798 phosphoethanolamine-lipid A transferase (mor-1) gene, partial cds                                                                   | 46.1      | 46.1        | 100%        | 0.006   | 100%  | KY013597.1  |
| Escherichia coli strain MDR_56 plasmid pMCR1-HV, complete sequence                                                                                                   | 46.1      | 46.1        | 100%        | 0.006   | 100%  | CP019908.1  |
| Cloning vector pGDP2, complete sequence                                                                                                                              | 46.1      | 46.1        | 100%        | 0.006   | 100%  | K089908.1   |
| Salmonella enterica subsp. enterica serovar Tiphimutium VL14P953 pMCR16_P053 mor-1 gene for phosphoethanolamine-lipid A transferase MCR-1.6, complete CDS            | 46.1      | 46.1        | 100%        | 0.006   | 100%  | HG_052861.1 |
| Escherichia coli HA1897 pHA1897 mor-1 gene for phosphoethanolamine-lipid A transferase MCR-1.3, complete CDS                                                         | 46.1      | 46.1        | 100%        | 0.006   | 100%  | HG_052861.1 |
| Escherichia coli WCEC1606 mor-1 gene for phosphoethanolamine-lipid A transferase MCR-1.4, complete CDS                                                               | 46.1      | 46.1        | 100%        | 0.006   | 100%  | HG_052861.1 |
| Escherichia coli 1256822 mor-1 gene for phosphoethanolamine-lipid A transferase MCR-1.5, complete CDS                                                                | 46.1      | 46.1        | 100%        | 0.006   | 100%  | HG_052861.1 |
| Escherichia coli strain EC111 plasmid pEC111, complete sequence                                                                                                      | 46.1      | 46.1        | 100%        | 0.006   | 100%  | K1471146.1  |
| Escherichia coli strain EC019 plasmid pEC019, complete sequence                                                                                                      | 46.1      | 46.1        | 100%        | 0.006   | 100%  | K1471145.1  |
| Escherichia coli strain EC008 plasmid pEC008, complete sequence                                                                                                      | 46.1      | 46.1        | 100%        | 0.006   | 100%  | K1471144.1  |
| Escherichia coli strain WCEC1904 phosphoethanolamine-lipid A transferase MCR-1.7 (mor-1) gene, mor-1 B allele, complete cds                                          | 46.1      | 46.1        | 100%        | 0.006   | 100%  | K1484848.1  |
| Klebsiella pneumoniae strain KP2442 plasmid pKP2442_1c330, complete sequence                                                                                         | 46.1      | 46.1        | 100%        | 0.006   | 100%  | K1434879.1  |
| Escherichia coli Para (papA), hypothetical protein (pCF132_02), hypothetical protein (pCF132_03), Mor1 (mor1), and Pap2 (pap2) genes, complete cds                   | 46.1      | 46.1        | 100%        | 0.006   | 100%  | KY563359.1  |
| Escherichia coli Para (papA), hypothetical protein (pCF132_02), hypothetical protein (pCF132_03), Mor1 (mor1), and Pap2 (pap2) genes, complete cds                   | 46.1      | 46.1        | 100%        | 0.006   | 100%  | KY563358.1  |
| Escherichia coli Para (papA), hypothetical protein (pCF131_02), hypothetical protein (pCF131_03), Mor1 (mor1), and Pap2 (pap2) genes, complete cds                   | 46.1      | 46.1        | 100%        | 0.006   | 100%  | KY563357.1  |
| Escherichia coli strain A434-59 plasmid phosphoethanolamine-lipid A transferase MCR-1 (mor-1) gene, complete cds                                                     | 46.1      | 46.1        | 100%        | 0.006   | 100%  | K0242436.1  |
| Escherichia coli plasmid pEC_04H4E12, complete sequence                                                                                                              | 46.1      | 46.1        | 100%        | 0.006   | 100%  | K0502772.1  |
| Salmonella enterica subsp. enterica serovar Tiphimutium strain VL14P953 pMCR16_P053, complete sequence                                                               | 46.1      | 46.1        | 100%        | 0.006   | 100%  | KY352406.1  |
| Salmonella Tiphimutium strain H9H_11 plasmid pH9H_11-MCR1, complete sequence                                                                                         | 46.1      | 46.1        | 100%        | 0.006   | 100%  | K0896066.1  |
| Escherichia coli strain 18H4E25 plasmid pEC_18H4E25, complete sequence                                                                                               | 46.1      | 46.1        | 100%        | 0.006   | 100%  | KY012278.1  |
| Escherichia coli strain 27COE18 plasmid pEC_27COE18, complete sequence                                                                                               | 46.1      | 46.1        | 100%        | 0.006   | 100%  | KY012275.1  |
| Escherichia coli strain 20COE13 plasmid pEC_20COE13, complete sequence                                                                                               | 46.1      | 46.1        | 100%        | 0.006   | 100%  | KY012274.1  |
| Salmonella enterica subsp. enterica strain R150626 plasmid pR150626, complete sequence                                                                               | 46.1      | 46.1        | 100%        | 0.006   | 100%  | KY120365.1  |
| Salmonella enterica subsp. enterica strain P111 plasmid pP111, complete sequence                                                                                     | 46.1      | 46.1        | 100%        | 0.006   | 100%  | KY120365.1  |
| Salmonella enterica subsp. enterica strain NG14043 plasmid pNG14043, complete sequence                                                                               | 46.1      | 46.1        | 100%        | 0.006   | 100%  | KY120364.1  |
| Salmonella enterica subsp. enterica strain C214 plasmid pC214, complete sequence                                                                                     | 46.1      | 46.1        | 100%        | 0.006   | 100%  | KY120363.1  |
| Escherichia coli strain MRSN134635 plasmid pMRSN134635_45.5, complete sequence                                                                                       | 46.1      | 46.1        | 100%        | 0.006   | 100%  | CP018124.1  |
| Escherichia coli strain MRSN134638 plasmid pMRSN134638_44.6, complete sequence                                                                                       | 46.1      | 46.1        | 100%        | 0.006   | 100%  | CP018118.1  |
| Escherichia coli strain MRSN134639 plasmid pMRSN134639_44.6, complete sequence                                                                                       | 46.1      | 46.1        | 100%        | 0.006   | 100%  | CP018112.1  |
| Escherichia coli strain MRSN134635 plasmid pMRSN134635_44.5, complete sequence                                                                                       | 46.1      | 46.1        | 100%        | 0.006   | 100%  | CP018109.1  |
| Escherichia coli strain MRSN135221 plasmid pMRSN135221_mor1, complete sequence                                                                                       | 46.1      | 46.1        | 100%        | 0.006   | 100%  | K0772391.1  |
| Escherichia coli strain rH53b-1 plasmid pEH53b-1, complete sequence                                                                                                  | 46.1      | 46.1        | 100%        | 0.006   | 100%  | LC191518.2  |
| Escherichia coli nxB, mor-1, pap2, ynfA, ynfB genes for release, phosphoethanolamine transferase, putative PAP family transmembrane protein, hemolysin activation pr | 46.1      | 46.1        | 100%        | 0.006   | 100%  | K0377419.1  |
| Klebsiella pneumoniae strain WCHP1511 plasmid pMCR_1511, complete sequence                                                                                           | 46.1      | 46.1        | 100%        | 0.006   | 100%  | K0505142.1  |
| Cronobacter sakazakii strain WF-6-19C plasmid pWF-6-19C_mor-1, complete sequence                                                                                     | 46.1      | 46.1        | 100%        | 0.006   | 100%  | K0505141.1  |
| Escherichia coli strain WF-6-19 plasmid pWF-6-19, partial sequence                                                                                                   | 46.1      | 46.1        | 100%        | 0.006   | 100%  | K0505141.1  |
| Escherichia coli strain E15017_00 plasmid pE15017_00, complete sequence                                                                                              | 46.1      | 46.1        | 100%        | 0.006   | 100%  | K0772777.1  |
| Escherichia coli strain E15004 plasmid pE15004, complete sequence                                                                                                    | 46.1      | 46.1        | 100%        | 0.006   | 100%  | K0772777.1  |
| Escherichia coli transposase (hnpA), MCR-1 (mor-1), hypothetical protein, and transcriptional regulator (yrfA) genes, complete cds                                   | 46.1      | 46.1        | 100%        | 0.006   | 100%  | K0888345.1  |
| Salmonella enterica strain Z119S plasmid pZ119S19S, complete sequence                                                                                                | 46.1      | 46.1        | 100%        | 0.006   | 100%  | K0267482.1  |
| Salmonella enterica strain SH138 plasmid pSH138, complete sequence                                                                                                   | 46.1      | 46.1        | 100%        | 0.006   | 100%  | K0267481.1  |
| Salmonella enterica strain SH38 plasmid pSH38, complete sequence                                                                                                     | 46.1      | 46.1        | 100%        | 0.006   | 100%  | K0267480.1  |
| Escherichia coli strain ICBEC7P plasmid pICBEC7Pmor, complete sequence                                                                                               | 46.1      | 46.1        | 100%        | 0.006   | 100%  | CP017246.1  |
| Escherichia coli strain 210221272 plasmid p210221272, complete sequence                                                                                              | 46.1      | 46.1        | 100%        | 0.006   | 100%  | CP016405.1  |
| Escherichia coli strain C002-121 plasmid pC002-121, complete sequence                                                                                                | 46.1      | 46.1        | 100%        | 0.006   | 100%  | K0484721.2  |
| Escherichia coli strain GD-8 plasmid pEGD-8-33, complete sequence                                                                                                    | 46.1      | 46.1        | 100%        | 0.006   | 100%  | K0264343.1  |
| Escherichia coli strain JS-61 plasmid pEJS-61-63, complete sequence                                                                                                  | 46.1      | 46.1        | 100%        | 0.006   | 100%  | K0264342.1  |
| Escherichia coli strain JS-60 plasmid pEJS-60-287, complete sequence                                                                                                 | 46.1      | 46.1        | 100%        | 0.006   | 100%  | K0264341.1  |
| Escherichia coli strain NDM132 plasmid p132 insertion sequence ISAg1 integrase (int) gene, complete cds, mor-1 (mor-1) and hypothetical protein genes, complete cds  | 46.1      | 46.1        | 100%        | 0.006   | 100%  | K048104.1   |
| Escherichia coli strain MCR1_NU plasmid pMCR1-NU-mc04, complete sequence                                                                                             | 46.1      | 46.1        | 100%        | 0.006   | 100%  | K0447768.1  |
| Klebsiella pneumoniae KP-884 unname05 mor-1 gene for phosphoethanolamine-lipid A transferase MCR-1.2, complete CDS                                                   | 46.1      | 46.1        | 100%        | 0.006   | 100%  | HG_061170.1 |
| Escherichia coli strain O1771H21 plasmid unname04, complete sequence                                                                                                 | 46.1      | 92.2        | 100%        | 0.006   | 100%  | CP015550.1  |
| Escherichia coli plasmid unname01, complete sequence                                                                                                                 | 46.1      | 46.1        | 100%        | 0.006   | 100%  | K0528999.1  |
| Escherichia coli strain 89 plasmid pECJ8-59-244, complete sequence                                                                                                   | 46.1      | 46.1        | 100%        | 0.006   | 100%  | K0084394.1  |
| Escherichia coli strain 61 plasmid pECJ8-61-63, complete sequence                                                                                                    | 46.1      | 46.1        | 100%        | 0.006   | 100%  | K0084393.1  |
| Escherichia coli strain 865 plasmid pECJ8-865-53, complete sequence                                                                                                  | 46.1      | 46.1        | 100%        | 0.006   | 100%  | K0084392.1  |
| Escherichia coli strain BA78 plasmid pBA78-MCR-1, complete sequence                                                                                                  | 46.1      | 46.1        | 100%        | 0.006   | 100%  | K0013540.1  |
| Escherichia coli strain BA77 plasmid pBA77-MCR-1, complete sequence                                                                                                  | 46.1      | 46.1        | 100%        | 0.006   | 100%  | K0013539.1  |
| Escherichia coli strain ABC149 plasmid pABC149-MCR-1, complete sequence                                                                                              | 46.1      | 46.1        | 100%        | 0.006   | 100%  | K0013538.1  |
| Klebsiella ascorbata strain WCH1410 plasmid pMCR_1410, complete sequence                                                                                             | 46.1      | 46.1        | 100%        | 0.006   | 100%  | K0922754.1  |
| Escherichia coli strain KP81 plasmid pKP81-8E, complete sequence                                                                                                     | 46.1      | 46.1        | 100%        | 0.006   | 100%  | K0894859.1  |
| Escherichia coli plasmid pKH457-3-8E, complete sequence                                                                                                              | 46.1      | 46.1        | 100%        | 0.006   | 100%  | K0363730.1  |
| Escherichia coli strain H2068 plasmid p12268, complete sequence                                                                                                      | 46.1      | 46.1        | 100%        | 0.006   | 100%  | K0129784.1  |

Figure S4. Cont.

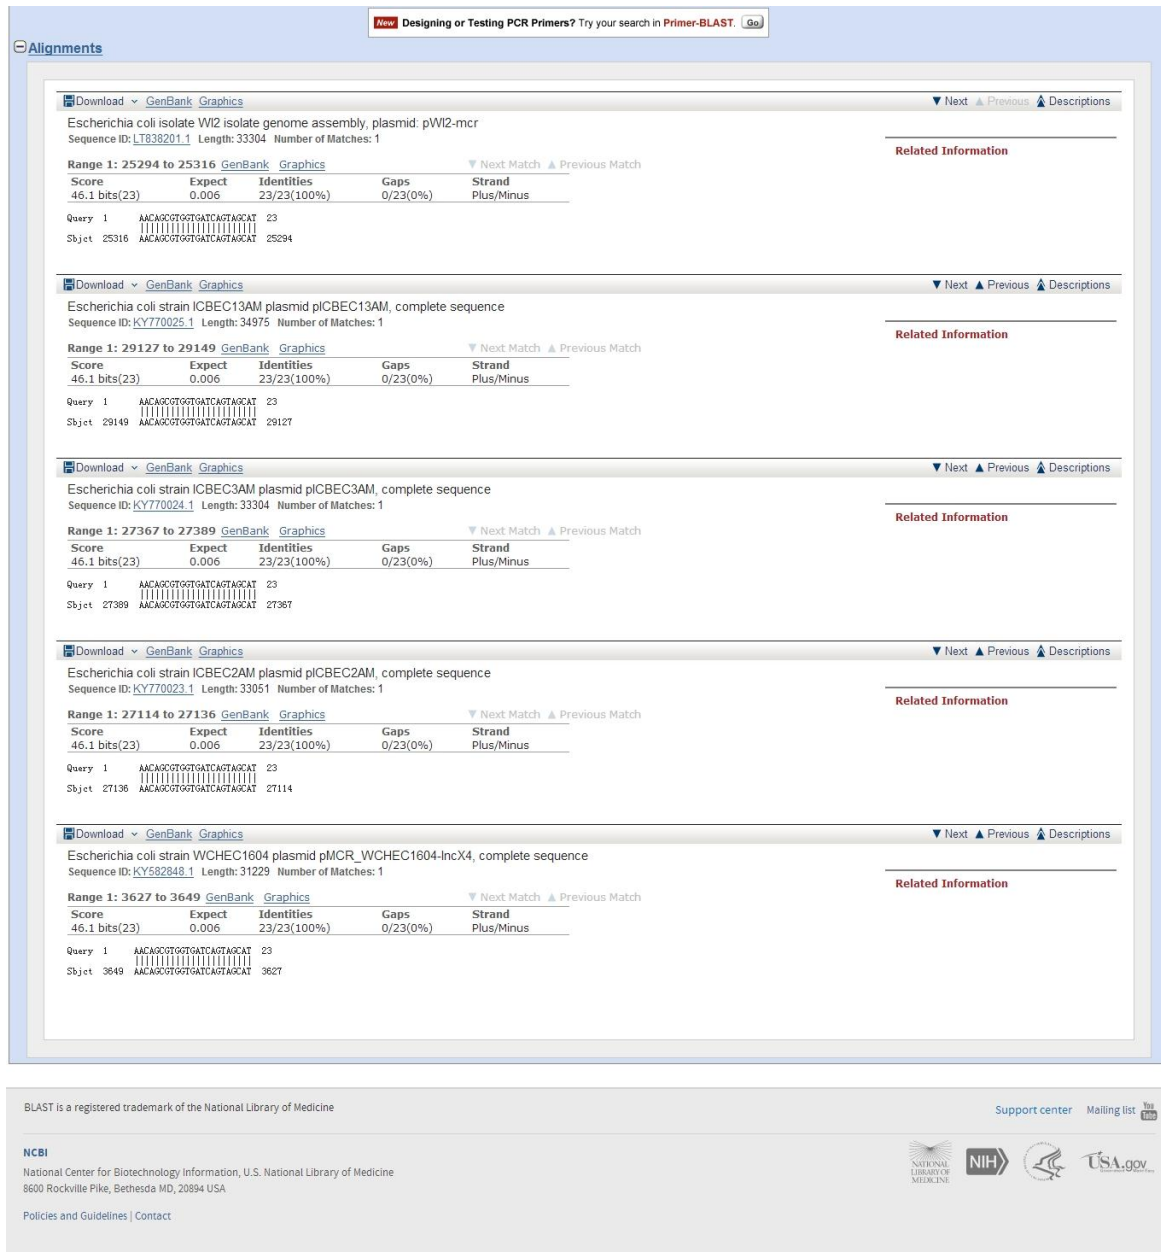

Figure S4. BLASTN analysis of primer M-Probe.

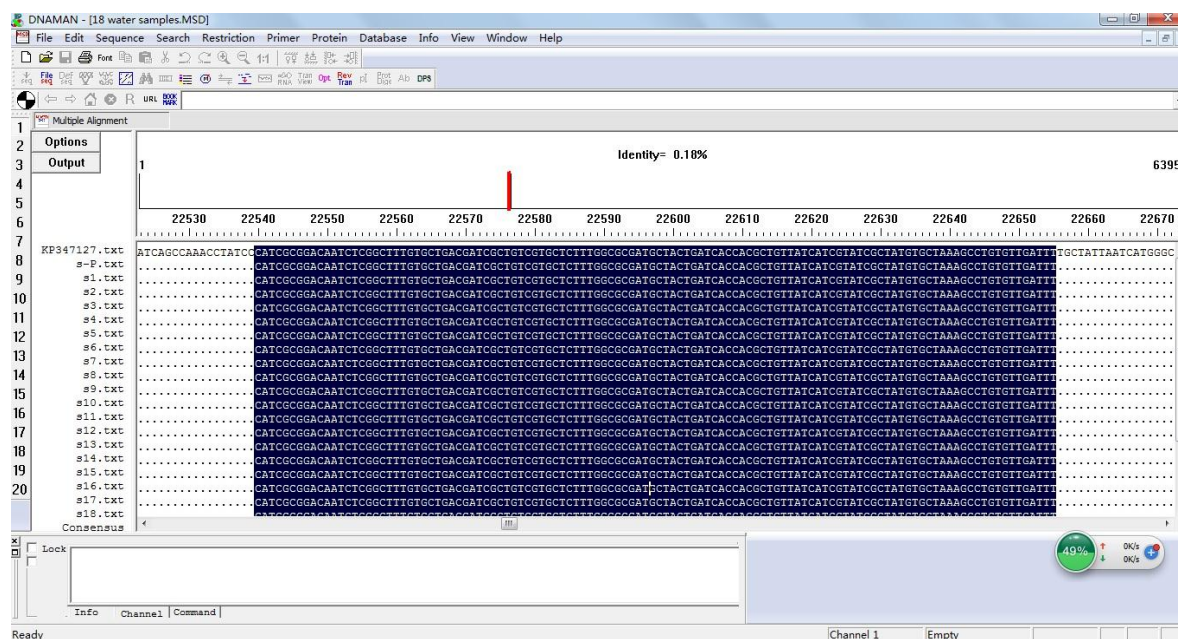

**Figure S5.** Alignment of the sequences of qPCR products and the *mcr-1* gene sequence: (KP347127: the *mcr-1* gene sequence reported by Liu and colleagues, s-P: positive control, s-1–s-18: water samples).

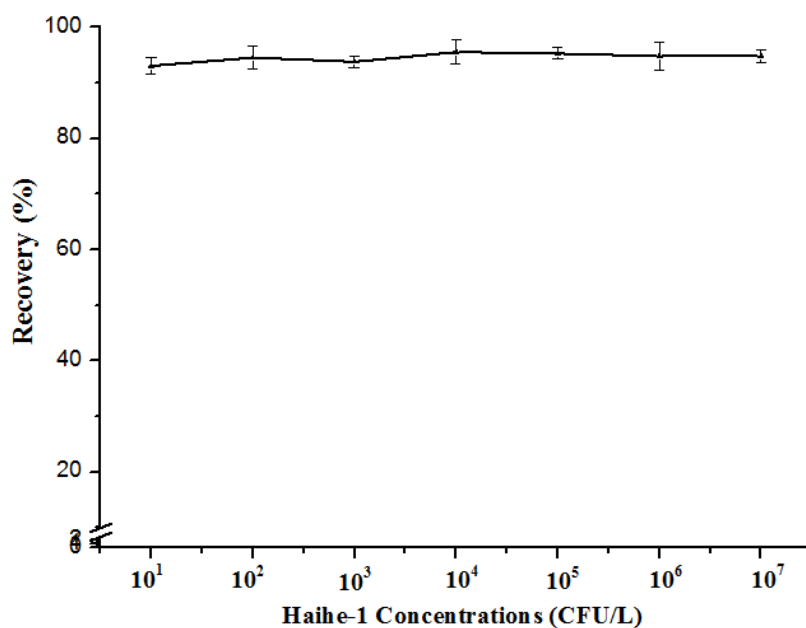

**Figure S6.** Recovery of Haihe-1 strain (10<sup>1</sup> CFU/L–10<sup>7</sup> CFU/L) spiked into 10L PBS

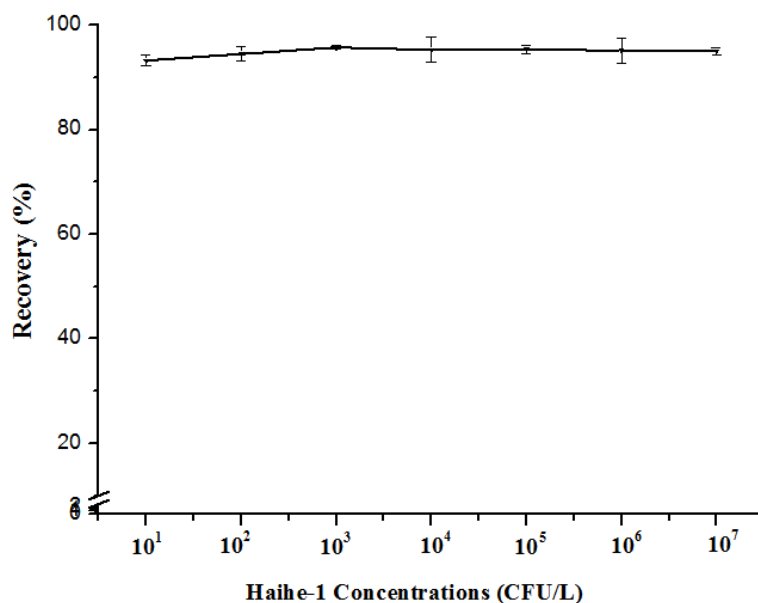

Figure S7. Recovery of Haihe-1 strain (10<sup>1</sup>CFU/L–10<sup>7</sup>CFU/L) spiked into 10L sterilized waster sample.

### Univariate Analysis of Variance

#### Between-Subjects Factors

|      |      | N |
|------|------|---|
| site | HD   | 6 |
|      | HE   | 6 |
|      | HU   | 6 |
| time | Apr  | 3 |
|      | Feb  | 3 |
|      | Jan  | 3 |
|      | June | 3 |
|      | Mar  | 3 |
|      | May  | 3 |

#### Tests of Between-Subjects Effects

Dependent Variable: IgGC

| Source          | Type III Sum of Squares | df | Mean Square | F        | Sig. |
|-----------------|-------------------------|----|-------------|----------|------|
| Corrected Model | 3.920 <sup>a</sup>      | 7  | .560        | 6.287    | .005 |
| Intercept       | 339.259                 | 1  | 339.259     | 3808.794 | .000 |
| → site          | 2.576                   | 2  | 1.288       | 14.459   | .001 |
| time            | 1.344                   | 5  | .269        | 3.019    | .065 |
| Error           | .891                    | 10 | .089        |          |      |
| Total           | 344.070                 | 18 |             |          |      |
| Corrected Total | 4.811                   | 17 |             |          |      |

a. R Squared = .815 (Adjusted R Squared = .685)

Figure S8. The multiple comparisons result of ANOVA.

## Post Hoc Tests

site

### Multiple Comparisons

Dependent Variable: IgGC

Bonferroni

| (I) site | (J) site | Mean Difference (I-J) | Std. Error | Sig. | 95% Confidence Interval |             |
|----------|----------|-----------------------|------------|------|-------------------------|-------------|
|          |          |                       |            |      | Lower Bound             | Upper Bound |
| HD       | HE       | -.644917*             | .1723104   | .011 | -1.139460               | -.150373    |
|          | HU       | .253731               | .1723104   | .515 | -.240812                | .748275     |
| HE       | HD       | .644917*              | .1723104   | .011 | .150373                 | 1.139460    |
|          | HU       | .898648*              | .1723104   | .001 | .404105                 | 1.393192    |
| HU       | HD       | -.253731              | .1723104   | .515 | -.748275                | .240812     |
|          | HE       | -.898648*             | .1723104   | .001 | -1.393192               | -.404105    |

Based on observed means.

The error term is Mean Square(Error) = .089.

\*. The mean difference is significant at the 0.05 level.

Figure S9. The deviance analysis result of ANOVA.

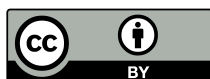

© 2017 by the authors; licensee MDPI, Basel, Switzerland. This article is an open access article distributed under the terms and conditions of the Creative Commons by Attribution (CC-BY) license (<http://creativecommons.org/licenses/by/4.0/>)
